# Supplementary material for: Does Mandibular Gonial Angle Influence the Eruption Pattern of the Lower Third Molar? A Three-Dimensional Study
Source: MDPI journal article supplement (doi:10.3390/jcm10184057), 2021-09-08
Supplement: s1 [file s1]

**Supplementary Table S1.** Reworking of JD classification

| Risk score of potential M3M surgery              |                                                       |                                                                                     |                                                                                     |                                                                                  |
|--------------------------------------------------|-------------------------------------------------------|-------------------------------------------------------------------------------------|-------------------------------------------------------------------------------------|----------------------------------------------------------------------------------|
|                                                  | Conventional<br>(0)                                   | Simple<br>(1)                                                                       | Moderate<br>(2)                                                                     | Complicated<br>(3)                                                               |
| <b>Parameters related to the position of M3M</b> |                                                       |                                                                                     |                                                                                     |                                                                                  |
| Lower second molar (M)                           | Crown of M3M is at or above the equator of M2M        | Crown of M3M is below the equator to the coronal third of M2M                       | Crown/roots of M3M is/are to the middle third of the root of M2M                    | Crown/roots of M3M is/are to the apical third of the root of M2M                 |
| Mandibular ramus (R)                             | M3M has sufficient space in dental arch               | M3M is partially impacted in the ramus                                              | M3M is completely impacted in the ramus                                             | M3M is completely impacted in the ramus with distoangular or horizontal position |
| Alveolar crest (A)                               | Complete eruption of M3M                              | Partial impaction - the widest part of the dental crown (equator) is above the bone | Partial impaction - The widest part of the dental crown (equator) is below the bone | Complete bone impaction                                                          |
| Mandibular canal (C)                             | Distance between M3M and mandibular canal $\geq 3$ mm | M3M is in contact with mandibular canal (its wall is identifiable)                  | M3M is in contact with mandibular canal (its wall is not identifiable)              | M3M roots surrounding the mandibular canal                                       |
| Mandibular lingual and buccal walls (B)          | Closer to buccal wall                                 | In the middle between lingual and buccal walls                                      | Closer to lingual wall                                                              | Closer to lingual wall, with partial or complete bone impaction (A2 or A3)       |
| Spatial position (S)                             | Vertical position ( $90^\circ$ )                      | Mesioangular position ( $\leq 60^\circ$ )                                           | Distoangular position ( $\geq 120^\circ$ )                                          | Horizontal ( $0^\circ$ ) or inverted position ( $270^\circ$ )                    |

M3M= lower third molar; H-GA= High gonial angle; L-GA= Low gonial angle; JD= Juodzbaly & Daugela classification
